# Supplementary material for: Precision synbiotics increase gut microbiome diversity and improve gastrointestinal symptoms in a pilot open-label study for autism spectrum disorder
Source: bioRxiv or medRxiv preprint supplement (doi:10.1101/2022.10.26.22281525), 2022-10-30

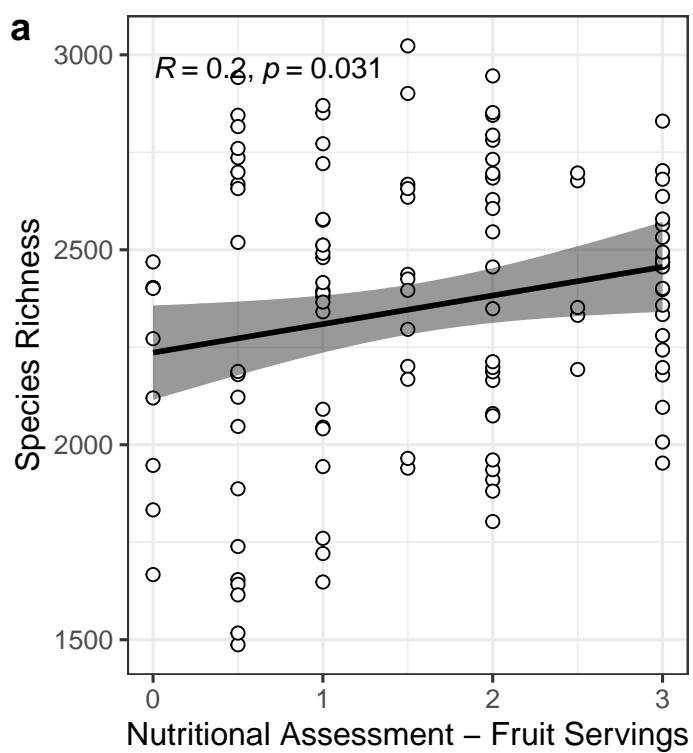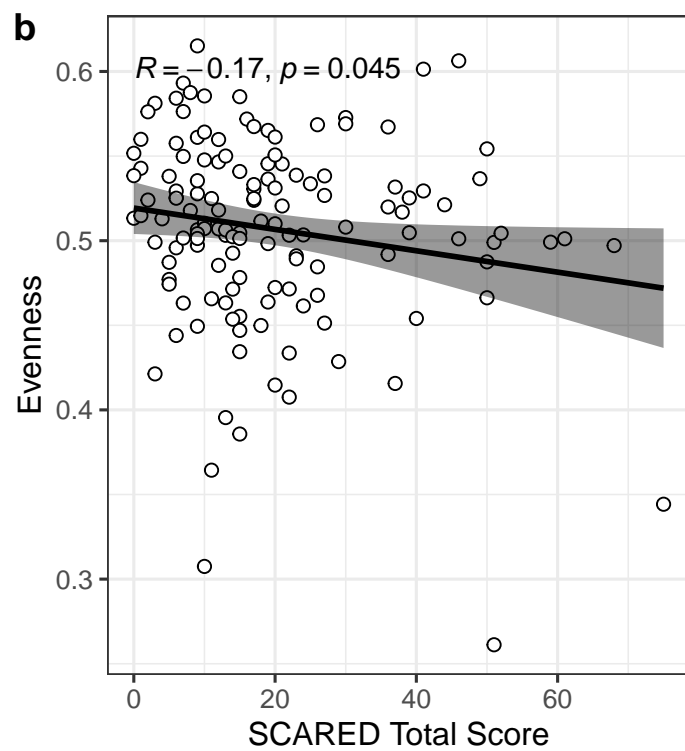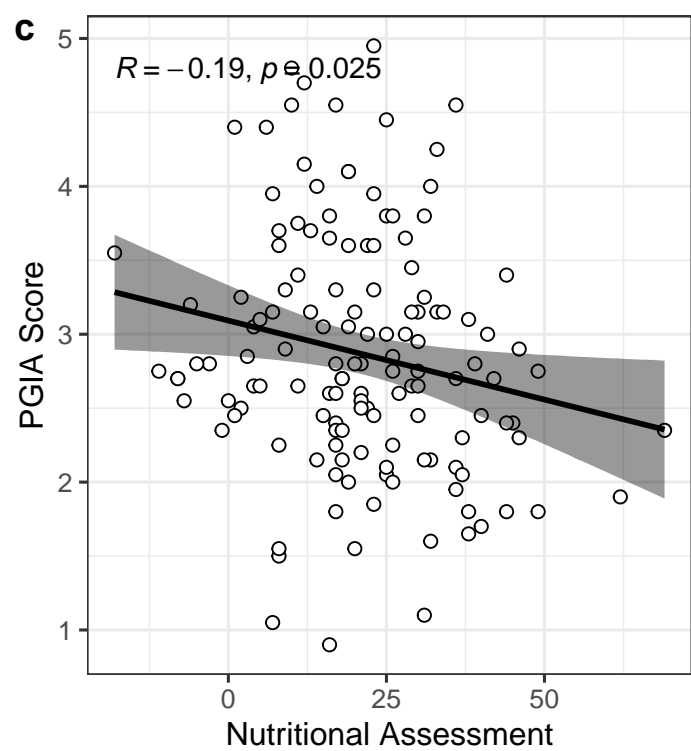

Supplement: Supplementary file [file media-1.pdf]
